# Supplementary material for: Cross-talk between SIM2s and NFκB regulates cyclooxygenase 2 expression in breast cancer
Source: Springer Nature journal article supplement (doi:10.1186/s13058-019-1224-y), 2019-11-29
Supplement: MOESM1 [file 17451576]

# Figure S1

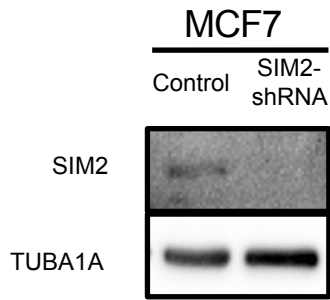

**Figure S2**

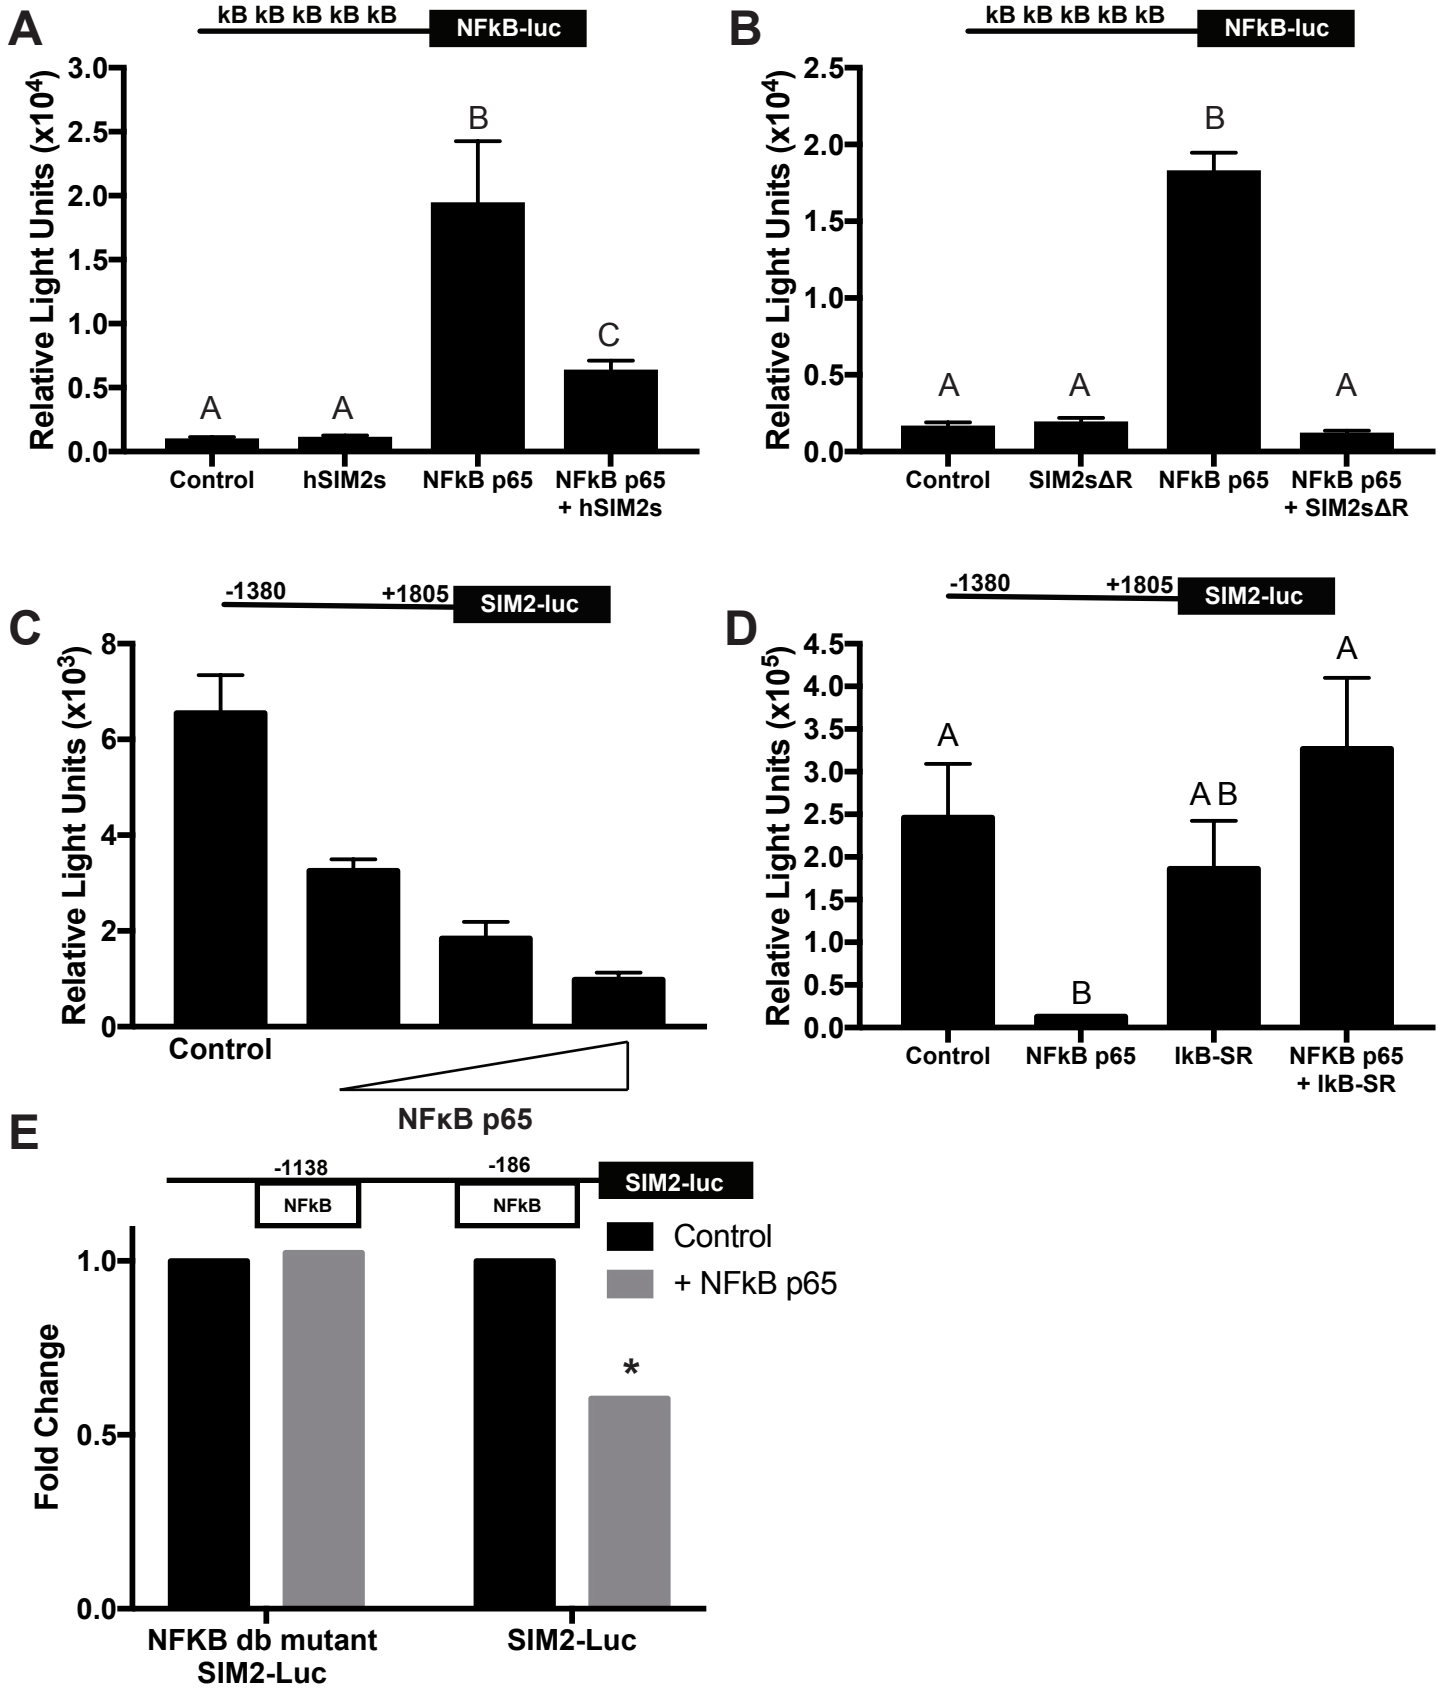

Figure S3

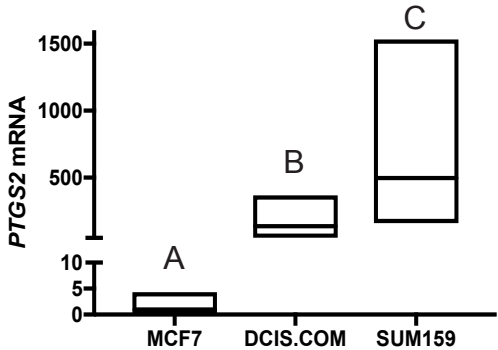

**Figure S4**

**A** SIM2 tumor size correlation  
COX-2  
SIM2 correlation

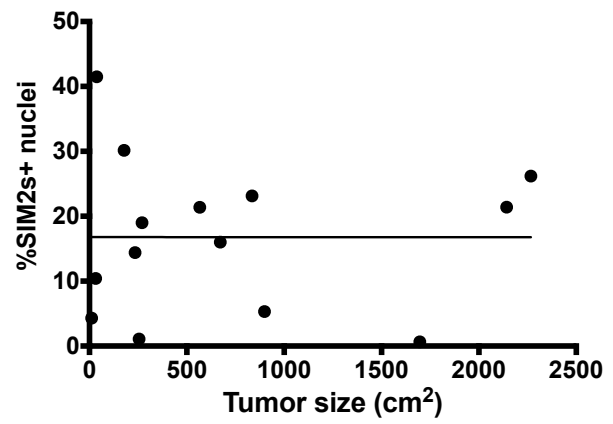

|                             | X vs. Column A    |
|-----------------------------|-------------------|
| Pearson r                   |                   |
| r                           | -0.663            |
| 95% confidence interval     | -0.883 to -0.2043 |
| R squared                   | 0.4396            |
| P value                     |                   |
| P (two-tailed)              | 0.0098            |
| P value summary             | **                |
| Significant? (alpha = 0.05) | Yes               |
| Number of XY Pairs          | 14                |

**B** COX-2 tumor size correlation

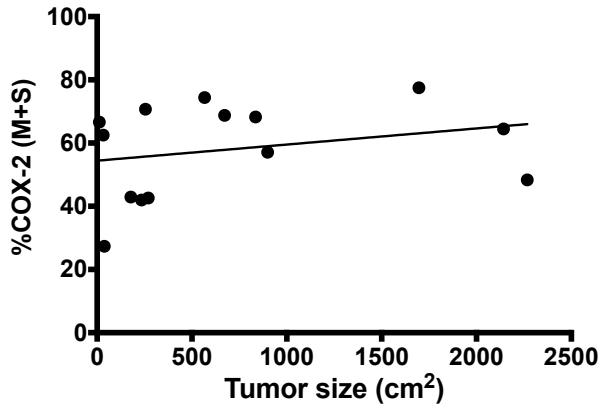

|                             | X vs. Column A    |
|-----------------------------|-------------------|
| Pearson r                   |                   |
| r                           | 0.2639            |
| 95% confidence interval     | -0.3101 to 0.6969 |
| R squared                   | 0.06967           |
| P value                     |                   |
| P (two-tailed)              | 0.3619            |
| P value summary             | ns                |
| Significant? (alpha = 0.05) | No                |
| Number of XY Pairs          | 14                |

Figure S5

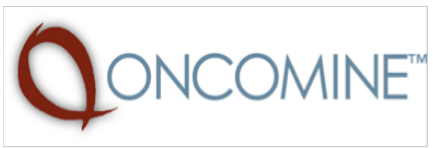

### SIM2 Expression in TCGA Breast Breast Cancer - Metastasis

Under-expression Gene Rank: 837 (in top 5%)      P-value: 0.006  
Reporter: A\_23\_P211110      t-Test: -7.522  
Fold Change: -6.614

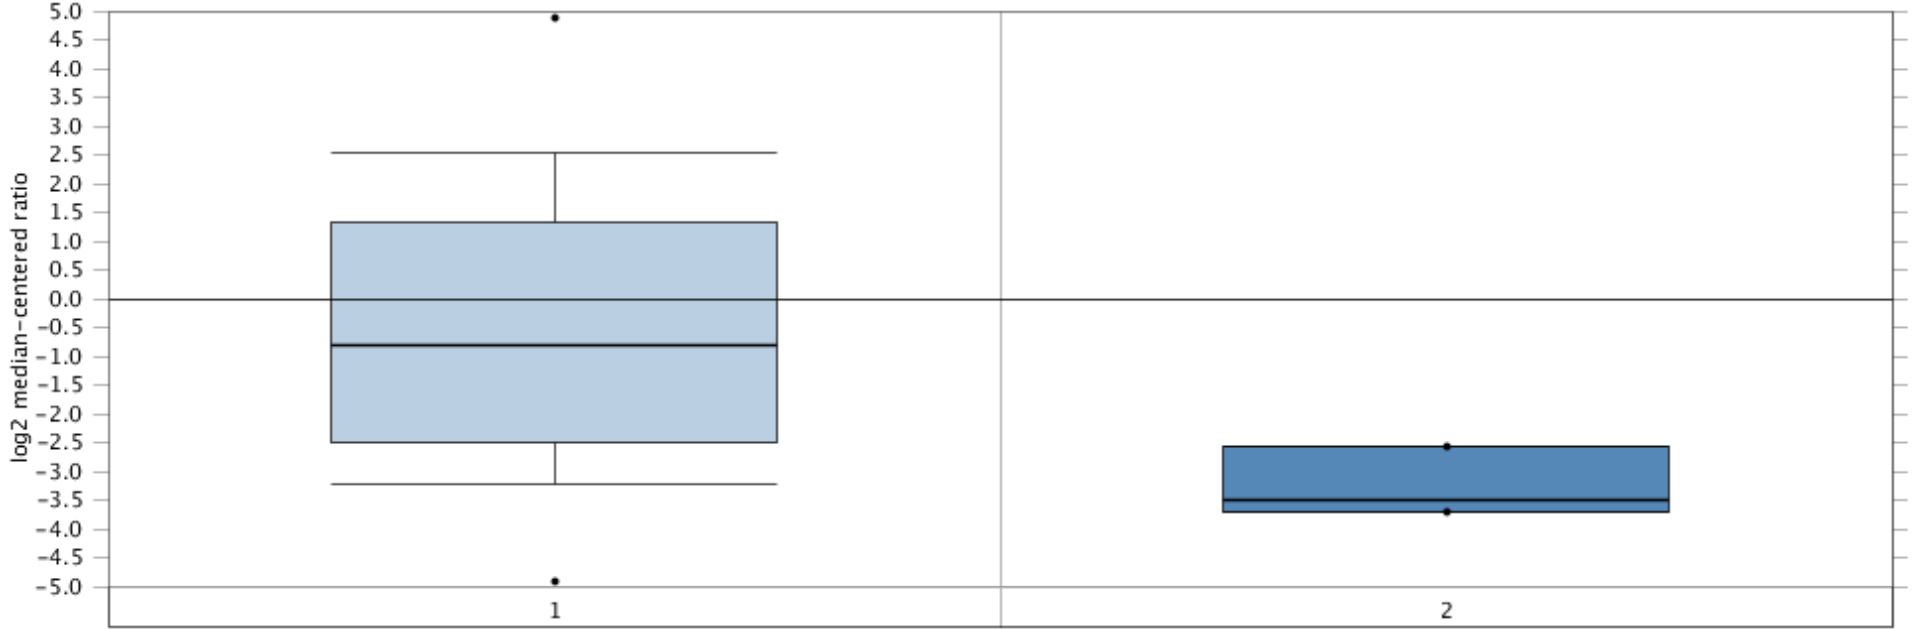

**Legend**

1. Primary Site (529) 2. Metastasis (3)

**TCGA Breast**

No Associated Paper 2011/09/02      593 samples  
mRNA      20,423 measured genes  
Platform not pre-defined in Oncomine

**Table S1**

| <b>Target</b>         | <b>Manufacturer</b>       | <b>Product Number</b> | <b>Dilution</b> | <b>Application</b> |
|-----------------------|---------------------------|-----------------------|-----------------|--------------------|
| SIM2                  | Millipore                 | AB4145                | 1:1000          | WB                 |
| SIM2                  | Aviva                     | Aviva ARP38551_P050   | 1:500           | WB,IHC             |
| ActinB                | Cell Signaling Technology | 3700s                 | 1:5000          | WB                 |
| NFkB p65              | Cell Signaling Technology | D14E12                | 1:1000          | WB                 |
| phospho-NFkB p65      | Cell Signaling Technology | 93H1                  | 1:1000          | WB                 |
| IKK $\beta$           | Cell Signaling Technology | D30C6                 | 1:1000          | WB                 |
| IKK $\alpha$          | Cell Signaling Technology | 3G12                  | 1:1000          | WB                 |
| COX-2                 | Cayman Chemical           | 160112                | 1:400           | IHC                |
| alpha Tubulin         | Abcam                     | ab4074                | 1:5000          | WB                 |
| Akt (pan)             | Cell Signaling Technology | 4691                  | 1:1000          | WB                 |
| Phospho-Akt (Ser473)  | Cell Signaling Technology | 4060                  | 1:1000          | WB                 |
| GAPDH                 | Proteintech               | 60004-1-Ig            | 1:5000          | WB                 |
| Anti-Rabbit Secondary | Cell Signaling Technology | 7074                  | 1:2000          | WB                 |
| Anti-Mouse Secondary  | Cell Signaling Technology | 7073                  | 1:2000          | WB                 |

**Table S2**

|       | Forward                | Reverse                 |
|-------|------------------------|-------------------------|
| SIM2s | AGGTGGGTCAGGTCTGCTC    | GAAGCAGAAAGAGGGCAAGTT   |
| TBP   | CGTCCCAGCAGGCAACA      | GGTGCAGTTGTGAGAGTCTGTGA |
| GAPDH | CCAGGTGGTCTCCTCTGACTTC | GTGGTCGTTGAGGGCAATG     |
| 18s   | CGGCTACCACATCCAAGGAA   | CTGGAATTACCGCGGCT       |
| PTGS2 | Bio-Rad, PrimePCR      |                         |
